# Supplementary material for: Microstructure and lattice strain control towards high-performance ambient green-printed perovskite solar cells
Source: Royal Society of Chemistry journal article supplement (doi:10.1039/d1ta01763b), 2021-01-01
Supplement: d1ta01763b1.pdf [file d1ta01763b1.pdf]

## Supporting Information

### **Microstructure and Lattice Strain Control towards High-Performance Ambient Green-Printed Perovskite Solar Cells**

Junjie Fang,<sup>a</sup> Zicheng Ding,<sup>\*a</sup> Xiaoming Chang,<sup>a</sup> Jing Lu,<sup>a</sup> Tinghuan Yang,<sup>a</sup> Jialun  
Wen,<sup>a</sup> Yuanyuan Fan,<sup>a</sup> Yalan Zhang,<sup>a</sup> Tao Luo,<sup>a</sup> Yonghua Chen,<sup>\*b</sup> Shengzhong (Frank)  
Liu<sup>\*ac</sup> and Kui Zhao<sup>\*a</sup>

<sup>a</sup>Key Laboratory of Applied Surface and Colloid Chemistry, Ministry of Education; Shaanxi Key Laboratory for Advanced Energy Devices; Shaanxi Engineering Lab for Advanced Energy Technology, School of Materials Science and Engineering, Shaanxi Normal University, Xi'an 710119, China

\*E-mail: zcding@snnu.edu.cn; szliu@dicp.ac.cn; zhaok@snnu.edu.cn

<sup>b</sup>Key Laboratory of Flexible Electronics (KLOFE) & Institution of Advanced Materials (IAM), Nanjing Tech University (NanjingTech), Nanjing 211816, China

\*E-mail: iamyhchen@njtech.edu.cn

<sup>c</sup>Dalian National Laboratory for Clean Energy; iChEM, Dalian Institute of Chemical Physics, Chinese Academy of Sciences, Dalian 116023, China

## Experimental Method

*Materials:* The SnO<sub>2</sub> precursor (Tin(IV) oxide, 15% in H<sub>2</sub>O colloidal dispersion), guanidinium iodide (GAI, 99.5%) and lead iodide (PbI<sub>2</sub>, 99.9985%) were purchased from Alfa Aesar. Methylammonium iodide (MAI, 99.5%), methylammonium bromide (MABr, 99.5%), methylammonium acetate (MAAc, 99.5%) and ethyl acetate (EA, 99.5%) were purchased from Xi'an Polymer Light Technology Corp. 2,2',7,7'-tetrakis-(N,N-di-p-methoxyphenylamine)-9,9'-spirobifluorene (spiro-OMeTAD) ( $\geq 99.0\%$ ) was purchased from Shenzhen Feiming Science and Technology Co., Ltd. All the chemicals were used as received without further purification.

*Solution preparation:* The perovskite precursor solution was prepared by dissolving GAI (0.072 mol), MAI (0.528 mol) and PbI<sub>2</sub> (0.6 mol) in 1 mL MAAc. The blend was stirred at 60 °C for 12 h to ensure the complete dissolution. MABr additive with molar ratios of 0%, 4%, 8% and 12% (MABr:Pb) was incorporated into the perovskite precursor solution. The spiro-OMeTAD solution consisted of 40 mg spiro-OMeTAD, 22  $\mu$ L lithium bis(trifluoromethanesulfonyl) imide solution (520 mg in 1 ml acetonitrile) and 36  $\mu$ L 4-tert-butylpyridine and 1 mL EA solvent. The purchased SnO<sub>2</sub> precursor solution was diluted by water in 8-fold prior to use.

*Device fabrication and characterization:* The fluorine doped tin oxide (FTO) glass substrates (2.9 cm  $\times$  2.9 cm) was cleaned by sonicating in acetone, isopropanol and ethanol sequentially. The substrates were then dried in a N<sub>2</sub> flow, and treated by O<sub>3</sub> plasma for 18 min before use. The ETL, perovskite layer and HTL are prepared by blade coating at a speed of 1 m min<sup>-1</sup> in ambient conditions. The SnO<sub>2</sub> ETL was

fabricated by blade coating the diluted solution on the pre-heated substrate at 100 °C, and then annealing the coated film at 150°C for 30 min. The perovskite layer of  $\text{GA}_{0.12}\text{MA}_{0.88}\text{PbI}_3$  was obtained by blade coating the precursor solution with different substrate temperature (130, 160, 190 and 210 °C), and then annealed at 100°C for 10 min. The perovskite films with different content of MABr additive (0%, 4%, 8% and 12%) were obtained similarly and the substrate temperature was fixed at 190 °C. The spiro-OMeTAD HTL was blade-coated at 40 °C and then stored in an auto-drying cabinet at 20 °C with a relative humidity of 15% for 8 h. Finally, a 100-nm thick gold electrode was evaporated on the top of HTL to complete the device. The  $J-V$  characteristics of the solar cells were analysed using a Keithley 2400 SourceMeter under simulated 1-sun AM1.5G illumination at  $100 \text{ mW cm}^{-2}$  (Oriel solar simulator) in ambient conditions at room temperature. A metal aperture of  $0.09 \text{ cm}^2$  was used to define the active area. The scan ranges from 2.5 V to  $-0.1 \text{ V}$  with a bias step of 0.02 V. The light intensity was calibrated using an NREL-traceable KG5-filtered silicon reference cell. The external quantum efficiency (EQE) was characterized on a QTest Station 2000ADI system (Crowntech Inc., USA) with a 300-W xenon lamp as the light source. The monochromatic light intensity was calibrated with a reference silicon photodiode.

*Film characterization:* X-ray diffraction (XRD) was performed on a Rigaku Smart Lab (X-ray Source:  $\text{Cu K}\alpha$ ,  $\lambda = 1.54 \text{ \AA}$ ). In Williamson-Hall analysis, the strain ( $\epsilon$ ) is derived from the following equation:  $\beta \cos\theta = \frac{k\lambda}{D} + 4\epsilon \sin\theta$ , where  $\beta$  is the crystallite size and can be calculated from the full width at half maximum (FWHM) of the peaks (110) (112)

(211) (202) (220) (310),  $\theta$  is Bragg diffraction angle,  $k$  is Scherrer constant,  $\lambda$  is X-ray wavelength, and  $D$  is the average thickness of the crystal grain perpendicular to the crystal plane. Fourier transform infrared (FTIR) spectra were measured with a Bruker Vertex 70. The scanning electron microscopy (SEM) was characterized using a FE-SEM (SU-8020, Hitachi). Femtosecond pump-probe transient absorption (front-side excitation) measurements were performed by using a commercial TA system (Time-Tech Spectra, LLC). The femtosecond laser pulse was generated by solid-state diode pump regeneration amplifier with 1030 nm wavelength and 100 kHz repetition rate (light conversion) and served as both pump and probe beams. Femtosecond pump-probe transient absorption measurements were performed at appropriate power density ( $16.64 \mu\text{J cm}^{-2}$ ) at room temperature. The pump pulse with a wavelength of 500 nm and duration of 290 fs generated via a second harmonic generator (SHG) was used to excite all the samples and the probe beam (from 600 to 900 nm) was detected by a high-speed spectrometer. The samples for XRD, SEM, absorption and FTIR characterization were blade-coated on FTO/SnO<sub>2</sub> layer. The electrical impedance spectroscopy (EIS) of the completed devices were measured on an electrochemical workstation (IM6ex, Zahner, Germany) under open-circuit conditions in dark. The frequency ranges from 10 Hz to 4 MHz. The steady-state photoluminescence (PL) and time-resolved photoluminescence (TRPL) (excitation at 510 nm, front-side excitation) were measured on PicoQuant FT-300 spectrometer with an excitation wavelength at 510 nm from front-side, and the samples were blade-coated at glass side. The carrier lifetime was determined using the following equation:

$$F(t) = \sum A_i \exp\left(-\frac{t}{\tau_i}\right) + A_0$$

where  $A_i$  and  $\tau_i$  are the amplitude and carrier lifetime of the  $i_{\text{th}}$  process, and  $A_0$  is the background signal intensity. The average carrier lifetime was calculated according to the following equation:

$$\tau_{ave} = \frac{\sum A_i \tau_i^2}{\sum A_i \tau_i}$$

*Charge mobility measurement:* The electron-only devices were fabricated based on the configuration of FTO/SnO<sub>2</sub>/Perovskite/PCBM/Ag. The dark  $I$ - $V$  characteristics were measured on a Keithley 2400 SourceMeter. The trap density was determined using the following equation:

$$n_{trap} = \frac{2\varepsilon_0\varepsilon_r V_{TFL}}{eL^2}$$

where  $\varepsilon_0$  is the vacuum permittivity,  $\varepsilon_r$  is the relative dielectric constant,  $V_{TFL}$  is the onset voltage of the trap-filled limit region,  $e$  is the elementary charge, and  $L$  is the distance between the electrodes. The electron mobility was further extracted using the Mott-Gurney law:

$$\mu = \frac{8J_D L^3}{9\varepsilon_0\varepsilon_r V^2}$$

where  $J_D$  is the current density and  $V$  is the applied voltage.

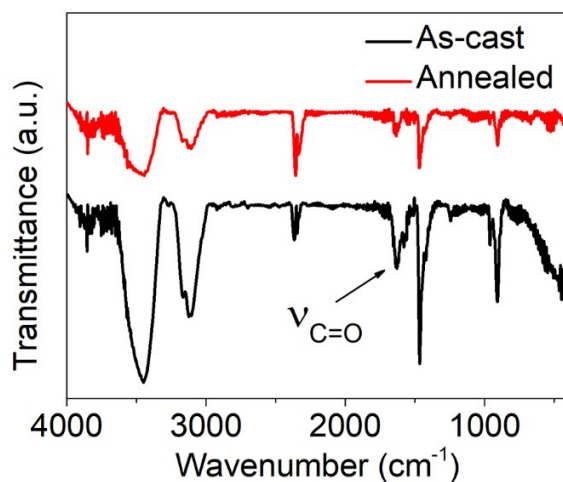

**Fig. S1** FTIR spectra of the as-cast and annealed blade-coated  $\text{GA}_{0.12}\text{MA}_{0.88}\text{PbI}_3$  film with MAAc as processing solvent. The substrate temperature is 190 °C, and the annealing temperature is 100 °C.

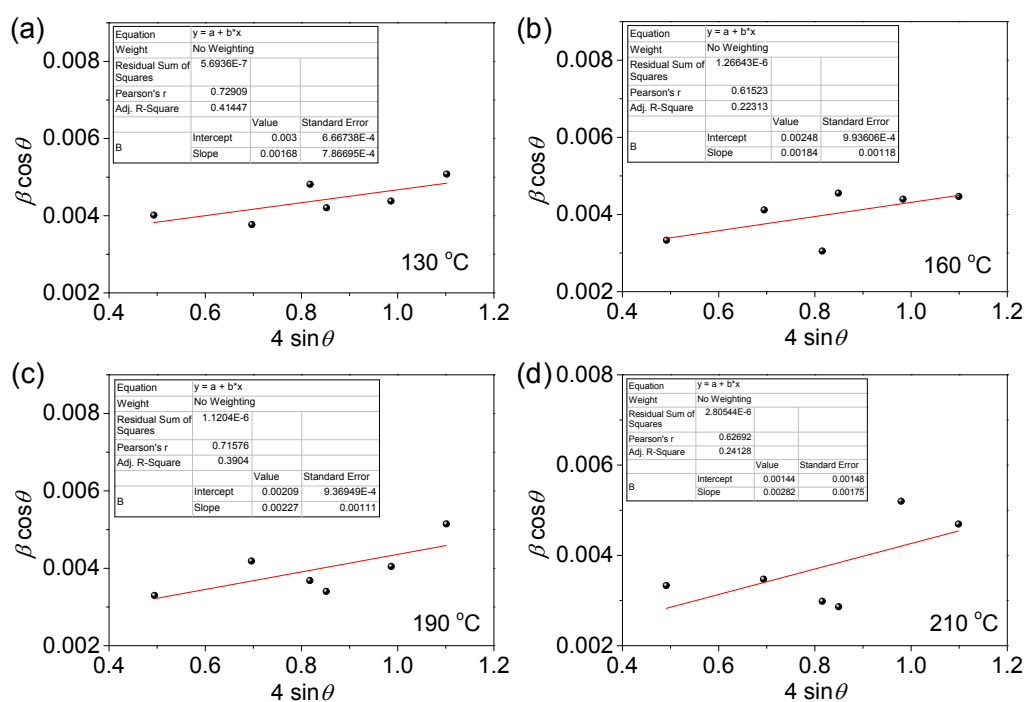

**Fig. S2** Williamson–Hall analysis of the  $\text{GA}_{0.12}\text{MA}_{0.88}\text{PbI}_3$  films at different temperatures.

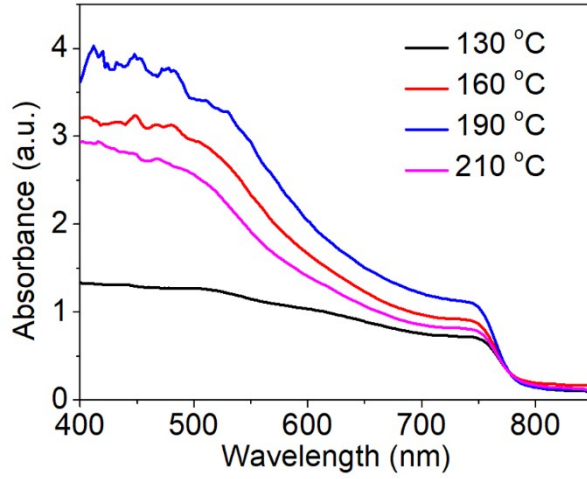

**Fig. S3** Absorption spectra of the  $\text{GA}_{0.12}\text{MA}_{0.88}\text{PbI}_3$  films at different temperatures on glass substrates.

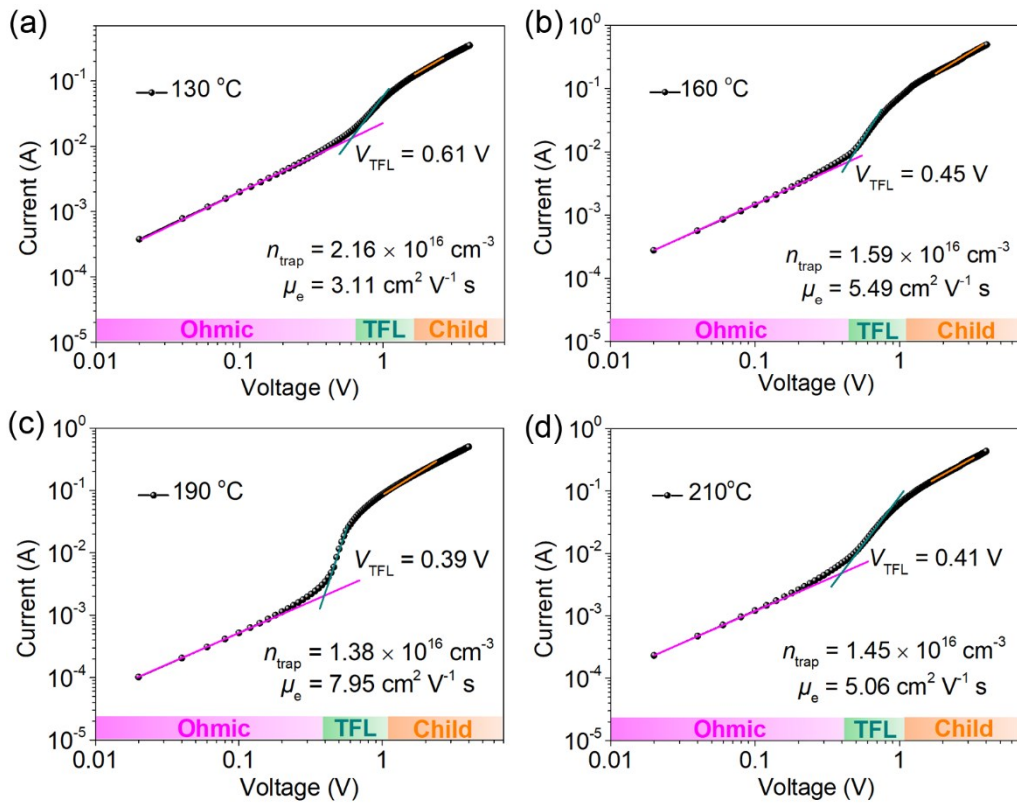

**Fig. S4** Dark  $I$ - $V$  measurement of the electron-only device based on the  $\text{GA}_{0.12}\text{MA}_{0.88}\text{PbI}_3$  films at different temperatures.

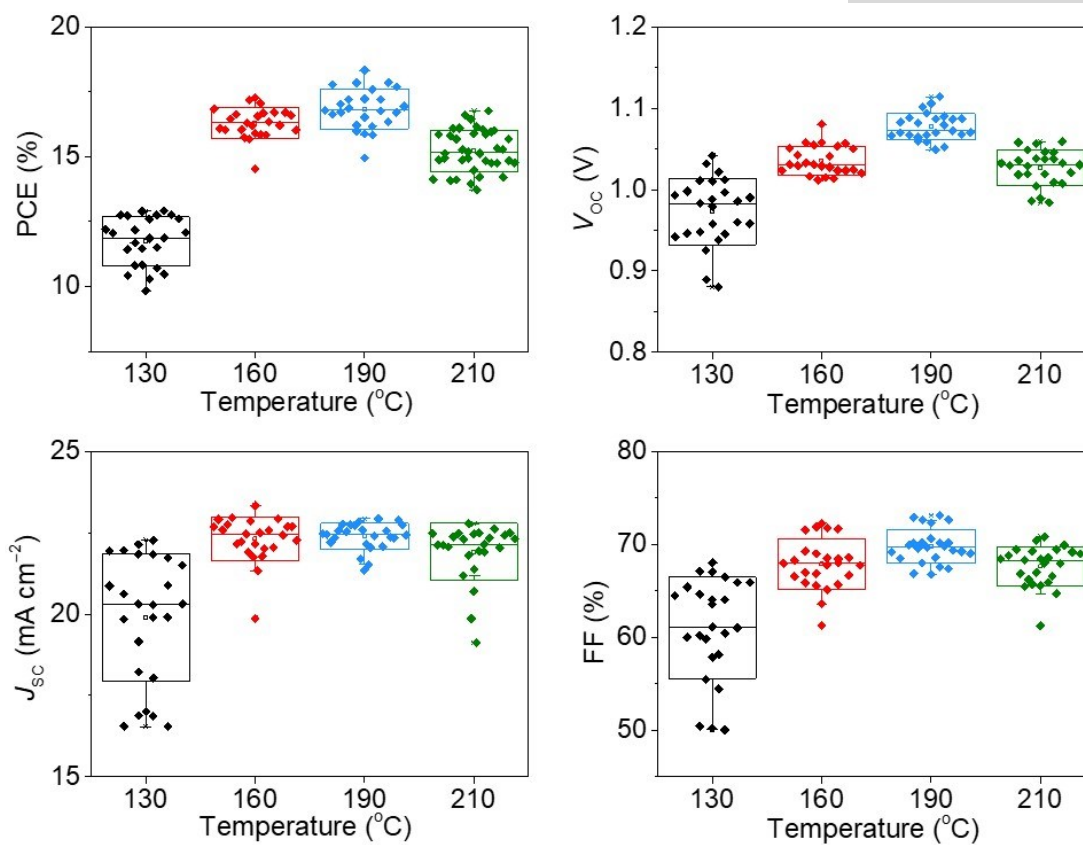

**Fig. S5** Distributions of PCE,  $V_{oc}$ ,  $J_{sc}$  and FF for the PSC devices based on the  $\text{GA}_{0.12}\text{MA}_{0.88}\text{PbI}_3$  films at different temperatures from 25 individual devices.

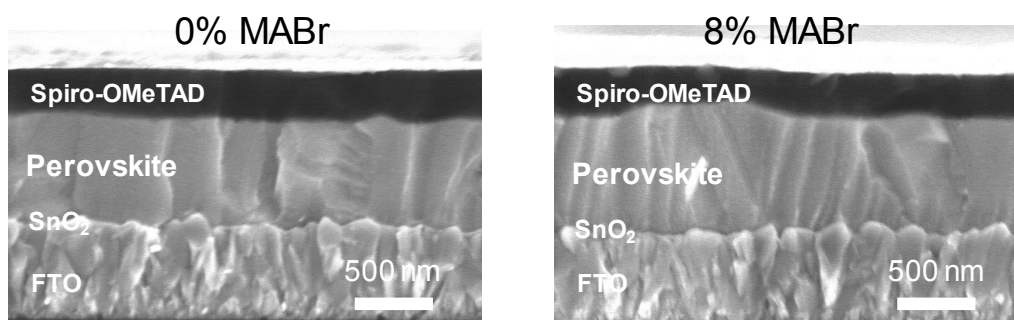

**Fig. S6** Cross-sectional SEM images of the PSC devices from the blade-coated  $\text{GA}_{0.12}\text{MA}_{0.88}\text{PbI}_3$  film without and with 8% MABr.



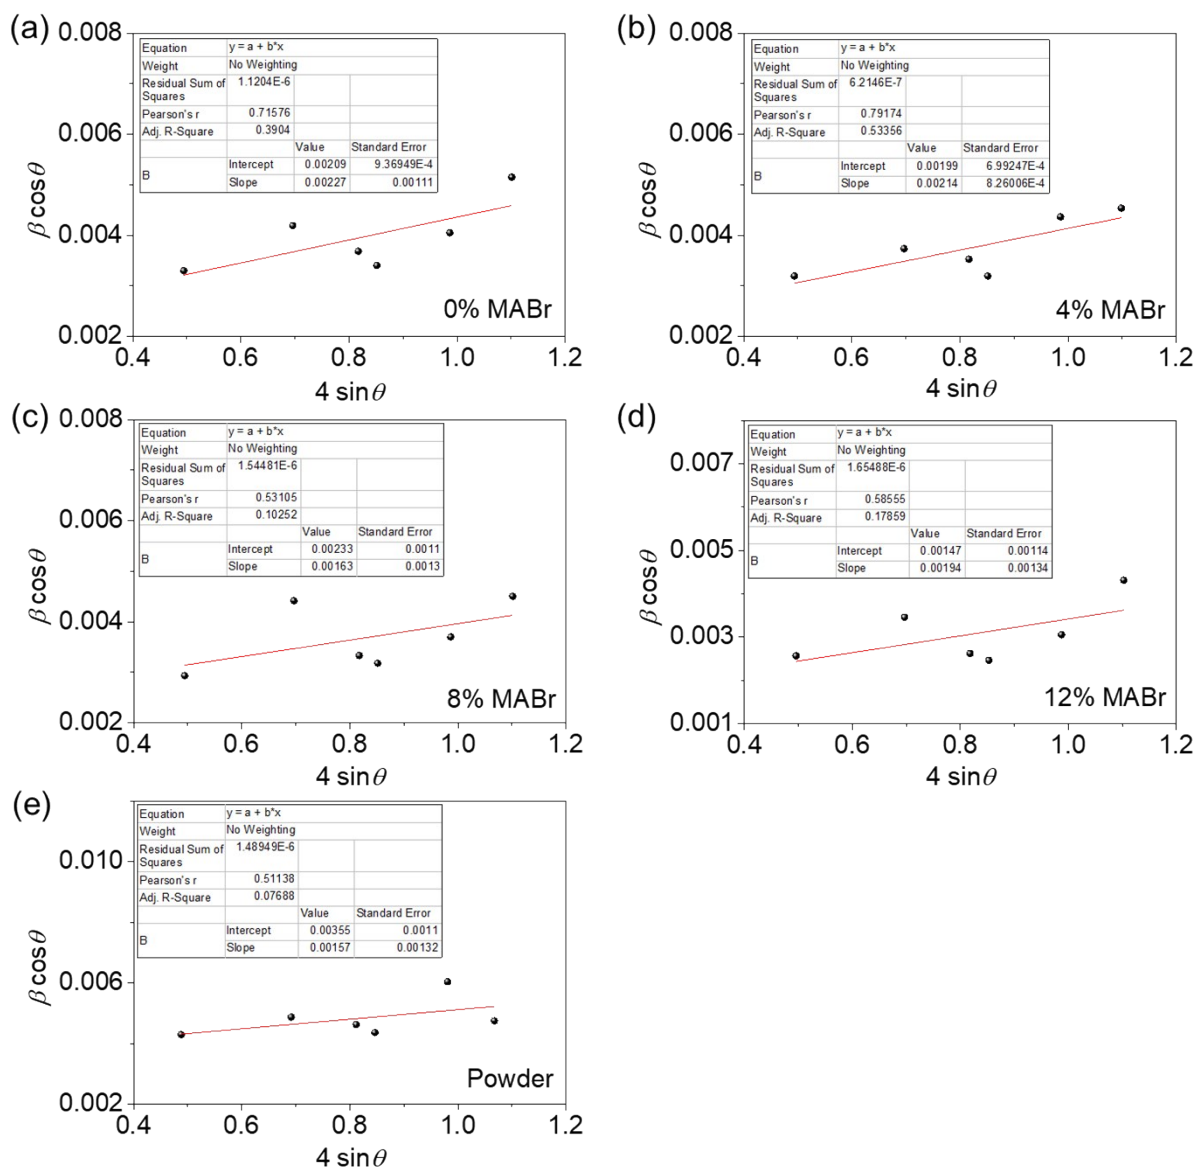

**Fig. S7** Williamson–Hall analysis of the  $\text{GA}_{0.12}\text{MA}_{0.88}\text{PbI}_3$  films with different content of MABr (a-d) and the scraped perovskite powder without MABr (e).

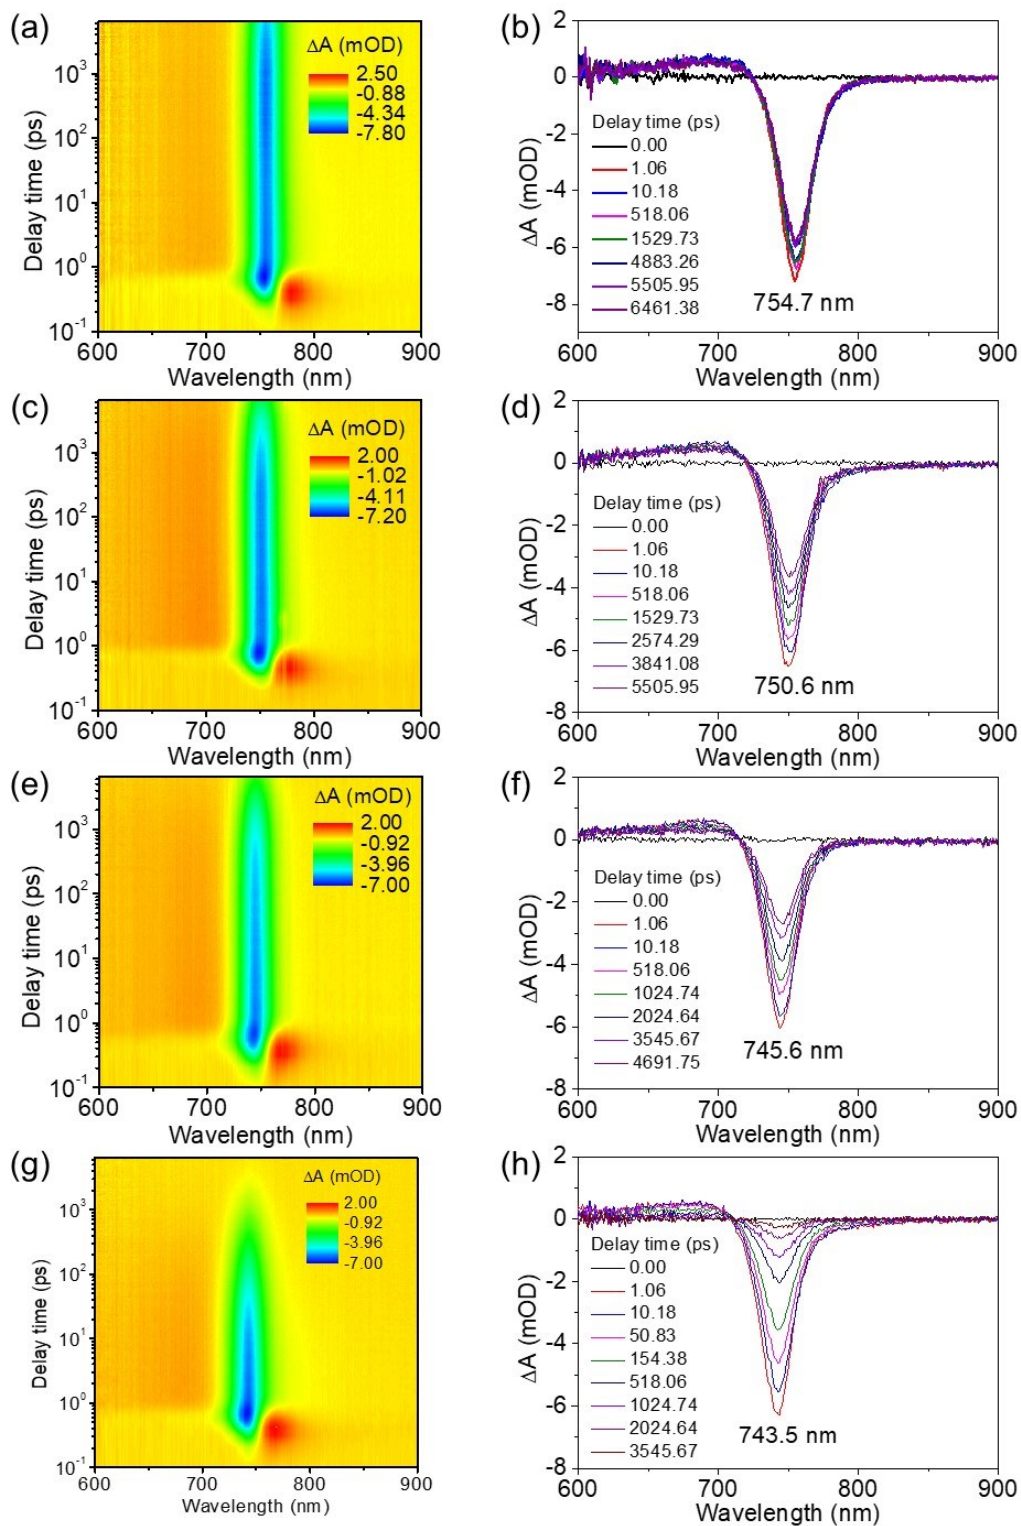

**Fig. S8** 2D pseudocolor TA spectra of the perovskite films with different content of MABr after excitation at 500 nm as a function of probe wavelength and probe delay time: (a) 0% MABr, (c) 4% MABr, (e) 8% MABr, (g) 12% MABr. (b), (d), (f) and (h) are the corresponding  $\Delta A$  spectra of (a), (c), (e) and (g) at different delay time.

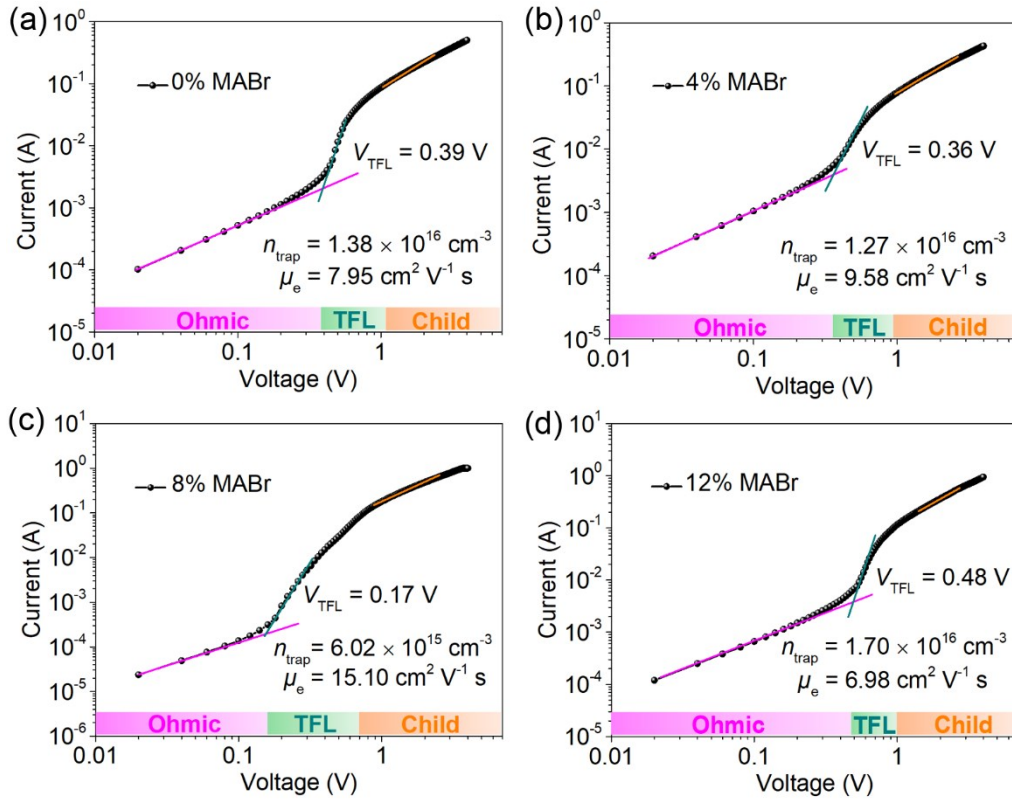

**Fig. S9** Dark  $I-V$  measurement of the electron-only device based on the  $\text{GA}_{0.12}\text{MA}_{0.88}\text{PbI}_3$  films with different content of MABr.

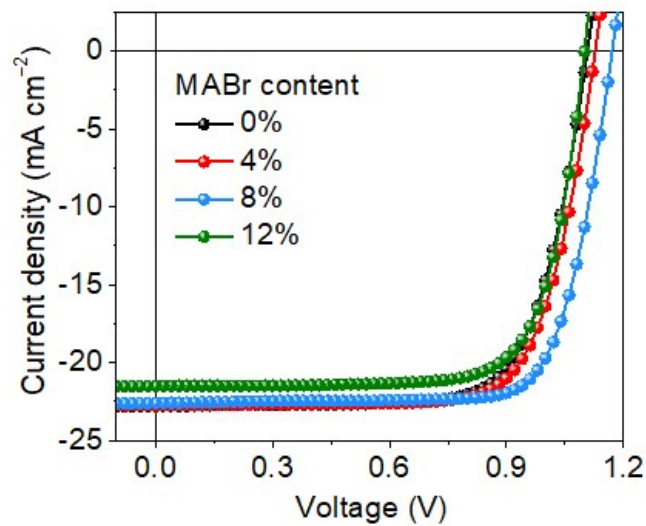

**Fig. S10** The  $J-V$  curves of the PSCs based on the films with different content of MABr.

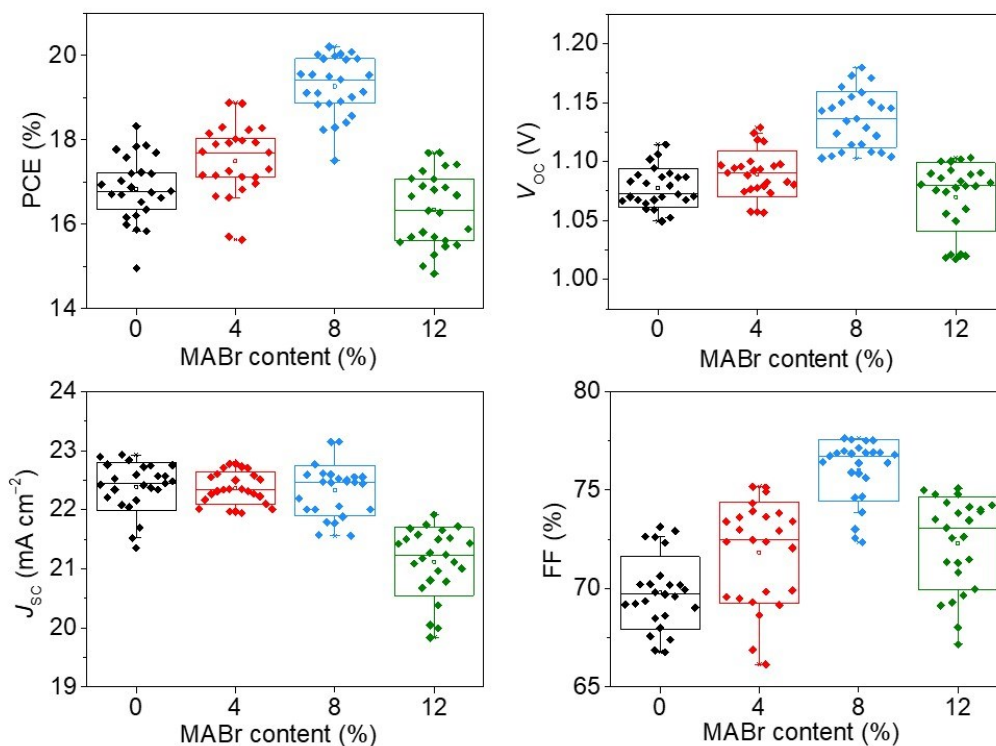

**Fig. S11** Distributions of PCE,  $V_{oc}$ ,  $J_{sc}$  and FF for the PSC devices based on the films with different content of MABr from 25 individual devices.

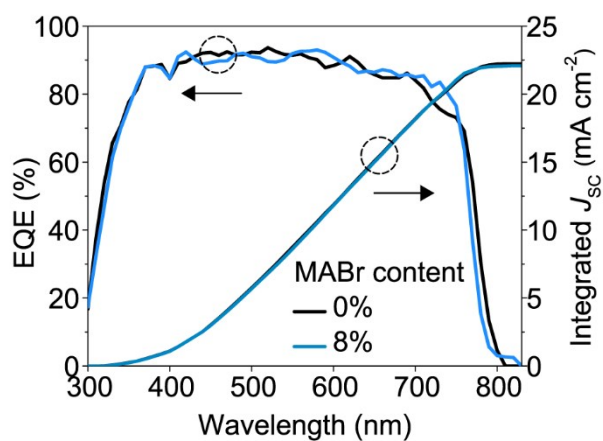

**Fig. S12** EQE spectra and integrated  $J_{sc}$  of the champion devices without and with 8% MABr.

**Supporting Table S1.** The fitting parameters of TRPL spectra for the  $\text{GA}_{0.12}\text{MA}_{0.88}\text{PbI}_3$  films processed at different temperatures.

| Temperature (°C) | $A_1$  | $\tau_1$ (ns) | $A_2$  | $\tau_2$ (ns) | $\tau_{\text{ave}}$ (ns) |
|------------------|--------|---------------|--------|---------------|--------------------------|
| 130              | 0.9627 | 146.60        | 0.0373 | 3.10          | 141.24                   |
| 160              | 0.9079 | 228.50        | 0.0921 | 48.03         | 211.88                   |
| 190              | 0.9213 | 303.67        | 0.0787 | 40.32         | 282.94                   |
| 210              | 0.9795 | 157.59        | 0.0205 | 3.75          | 154.43                   |

**Supporting Table S2.** The fitting parameters of TRPL spectra for the  $\text{GA}_{0.12}\text{MA}_{0.88}\text{PbI}_3$  films with different MABr content.

| MABr content | $A_1$  | $\tau_1$ (ns) | $A_2$  | $\tau_2$ (ns) | $\tau_{\text{ave}}$ (ns) |
|--------------|--------|---------------|--------|---------------|--------------------------|
| 0%           | 0.9213 | 303.67        | 0.0787 | 40.32         | 282.94                   |
| 4%           | 0.9745 | 431.18        | 0.0255 | 43.36         | 421.30                   |
| 8%           | 0.9727 | 464.90        | 0.0273 | 59.98         | 453.84                   |
| 12%          | 0.9680 | 383.39        | 0.0320 | 43.86         | 372.54                   |

**Supporting Table S3.** The EIS parameters for the completed PSC devices based on the perovskite films with different content of MABr.

| MABr content | $R_s$ ( $\Omega$ ) | $C_{\text{rec}}$ (nF) | $R_{\text{rec}}$ ( $\Omega$ ) |
|--------------|--------------------|-----------------------|-------------------------------|
| 0%           | 9.1                | 168.9                 | 28.0                          |
| 4%           | 8.7                | 311.7                 | 35.8                          |
| 8%           | 5.7                | 102.5                 | 40.6                          |
| 12%          | 6.7                | 236.2                 | 34.0                          |

**Supporting Table S4.** The photovoltaic parameters comparison of this work with other state-of-art solution-processed MAPbI<sub>3</sub>-based PSCs.

| Method       | Toxicity | Solvent                                        | $V_{oc}$<br>(V) | $J_{sc}$<br>(mA cm <sup>-2</sup> ) | FF<br>(%) | PCE<br>(%) | Reference |
|--------------|----------|------------------------------------------------|-----------------|------------------------------------|-----------|------------|-----------|
| Spin-coating | Toxic    | DMF, DMSO, CB                                  | 1.10            | 21.81                              | 79.39     | 19.18      | [1]       |
|              |          | GBL, ACN                                       | 1.12            | 23.46                              | 78.9      | 20.63      | [2]       |
|              |          | DMF, DMSO, Toluene                             | 1.116           | 23.5                               | 82        | 21.6       | [3]       |
|              |          | DMF, NMP                                       | 1.10            | 21.01                              | 80.13     | 18.50      | [4]       |
|              |          | DMF, DMSO, DEE                                 | 1.10            | 22.69                              | 84.07     | 21.01      | [5]       |
|              |          | DMF, aniline                                   | 1.112           | 22.983                             | 80.8      | 20.65      | [6]       |
|              |          | DMF, DMSO, toluene                             | 1.15            | 22.7                               | 80.9      | 21.1       | [7]       |
|              |          | DMSO, DMF, IPA                                 | 1.12            | 23.83                              | 79.09     | 21.08      | [8]       |
|              |          | DMF, DMSO, toluene                             | 1.07            | 22.8                               | 82.2      | 20.05      | [9]       |
|              |          | DMF, GBL, toluene                              | 1.111           | 23.11                              | 76.75     | 19.71      | [10]      |
|              |          | DMF, DMSO, CB                                  | 1.14            | 22.57                              | 78        | 20.18      | [11]      |
| Spin-coating | Green    | MAAc                                           | 1.11            | 23.16                              | 78.01     | 20.05      | [12]      |
|              |          | ACN (with CH <sub>3</sub> NH <sub>2</sub> gas) | 1.12            | 22.39                              | 77.7      | 20.26      | [13]      |
| Printing     | Toxic    | DMF, DMSO                                      | 1.09            | 21.98                              | 81        | 19.41      | [14]      |
|              |          | DMF                                            | 1.18            | 22.5                               | 81.7      | 21.7       | [15]      |
|              |          | NMP, DMF                                       | 1.097           | 22.53                              | 77.1      | 19.06      | [16]      |
|              |          | DMF, DMSO, CB                                  | 1.10            | 22.7                               | 81        | 20.2       | [17]      |
|              |          | DMF, DMSO, IPA                                 | 1.03            | 21.36                              | 76        | 16.71      | [18]      |
|              |          | DMF, DMSO, CB                                  | 1.09            | 23.46                              | 78.51     | 20.08      | [19]      |
|              |          | IPA, DMF, GBL                                  | 1.10            | 21.4                               | 77.6      | 18.3       | [20]      |
|              |          | DMF, DMSO, IPA                                 | 1.08            | 22.66                              | 76.2      | 18.64      | [21]      |
|              |          | DMF, DMSO, DEE                                 | 1.07            | 20.7                               | 77.1      | 17.2       | [22]      |
|              |          | 2-methoxyethanol                               | 1.19            | 21.03                              | 78        | 19.44      | [23]      |
|              |          | 2-methoxyethanol, ACN                          | 1.13            | 23.0                               | 81.8      | 21.3       | [24]      |
| Printing     | Green    | tetrahydrofuran, methylamine, ethanol          | 1.09            | 23.86                              | 77        | 20.02      | [25]      |
|              |          | ACN, methylamine, methanol                     | 1.09            | 24.93                              | 78.61     | 21.12      | [26]      |
|              |          | MAAc                                           | 1.17            | 22.60                              | 76.37     | 20.21      | This work |

Notes: DMF refers to N,N-dimethylformamide, DMSO refers to dimethylsulfoxide, CB refers to chlorobenzene, GBL refers to  $\gamma$ -butyrolactone, ACN refers to acetonitrile, NMP refers to N-methyl-2-pyrrolidone, DEE refers to diethyl ether, IPA refers to isopropanol.



## Supporting References

- 1 B. Kim, M. Kim, J. H. Lee and S. I. Seok, *Adv. Sci.*, 2020, **7**, 1901840.
- 2 Y. Hou, K. Wang, D. Yang, Y. Jiang, N. Yennawar, K. Wang, M. Sanghadasa, C. Wu and S. Priya, *ACS Energy Lett.*, 2019, **4**, 2646–2655.
- 3 H. Chen, Q. Wei, M. I. Saidaminov, F. Wang, A. Johnston, Y. Hou, Z. Peng, K. Xu, W. Zhou, Z. Liu, L. Qiao, X. Wang, S. Xu, J. Li, R. Long, Y. Ke, E. H. Sargent and Z. Ning, *Adv. Mater.*, 2019, **31**, 1903559.
- 4 G. Jang, H. C. Kwon, S. Ma, S. C. Yun, H. Yang and J. Moon, *Adv. Energy Mater.*, 2019, **9**, 1901719.
- 5 Z. Li, F. Wang, C. Liu, F. Gao, L. Shen and W. Guo, *J. Mater. Chem. A*, 2019, **7**, 22359–22365.
- 6 Y. Wang, T. Li, Z. Li, S. Wang and X. Deng, *Adv. Funct. Mater.*, 2019, **29**, 1903330.
- 7 Y. Bai, Y. Lin, L. Ren, X. Shi, E. Strounina, Y. Deng, Q. Wang, Y. Fang, X. Zheng, Y. Lin, Z.-G. Chen, Y. Du, L. Wang and J. Huang, *ACS Energy Lett.*, 2019, **4**, 1231–1240.
- 8 S. Wang, H. Chen, J. Zhang, G. Xu, W. Chen, R. Xue, M. Zhang, Y. Li and Y. Li, *Adv. Mater.*, 2019, **31**, 1903691.
- 9 B. Wang, F. Wu, S. Bi, J. Zhou, J. Wang, X. Leng, D. Zhang, R. Meng, B. Xue, C. Zong, L. Zhu, Y. Zhang and H. Zhou, *J. Mater. Chem. A*, 2019, **7**, 23895–23903.
- 10 Y. Wang, P. Wang, X. Zhou, C. Li, H. Li, X. Hu, F. Li, X. Liu, M. Li and Y. Song, *Adv. Energy Mater.*, 2018, **8**, 1702960.
- 11 Q. He, M. Worku, L. Xu, C. Zhou, H. Lin, A. J. Robb, K. Hanson, Y. Xin and B. Ma, *ACS Appl. Mater. Interfaces*, 2020, **12**, 1159–1168.
- 12 L. Chao, Y. Xia, B. Li, G. Xing, Y. Chen and W. Huang, *Chem.*, 2019, **5**, 995–1006.
- 13 X. Huang, R. Chen, G. Deng, F. Han, P. Ruan, F. Cheng, J. Yin, B. Wu and N. Zheng, *J. Am. Chem. Soc.*, 2020, **142**, 6149–6157.
- 14 Z. Wang, L. Zeng, C. Zhang, Y. Lu, S. Qiu, C. Wang, C. Liu, L. Pan, S. Wu, J. Hu, G.

- 
- Liang, P. Fan, H. J. Egelhaaf, C. J. Brabec, F. Guo and Y. Mai, *Adv. Funct. Mater.*, 2020, **30**, 2001240.
- 15 W. Q. Wu, Z. Yang, P. N. Rudd, Y. Shao, X. Dai, H. Wei, J. Zhao, Y. Fang, Q. Wang, Y. Liu, Y. Deng, X. Xiao, Y. Feng and J. Huang, *Sci. Adv.*, 2019, **5**, eaav8925.
- 16 M. Yang, Z. Li, M. O. Reese, O. G. Reid, D. H. Kim, S. Siol, T. R. Klein, Y. Yan, J. J. Berry, M. F. A. M. van Hest and K. Zhu, *Nat. Energy*, 2017, **2**, 17038.
- 17 W. Q. Wu, Q. Wang, Y. Fang, Y. Shao, S. Tang, Y. Deng, H. Lu, Y. Liu, T. Li, Z. Yang, A. Gruverman and J. Huang, *Nat. Commun.*, 2018, **9**, 1625.
- 18 F. Guo, W. He, S. Qiu, C. Wang, X. Liu, K. Forberich, C. J. Brabec and Y. Mai, *Adv. Funct. Mater.*, 2019, **29**, 1900964.
- 19 J. Ding, Q. Han, Q.-Q. Ge, D.-J. Xue, J.-Y. Ma, B.-Y. Zhao, Y.-X. Chen, J. Liu, D. B. Mitzi and J.-S. Hu, *Joule*, 2019, **3**, 402–416.
- 20 J. H. Heo, M. H. Lee, M. H. Jang and S. H. Im, *J. Mater. Chem. A*, 2016, **4**, 17636–17642.
- 21 P. Li, C. Liang, B. Bao, Y. Li, X. Hu, Y. Wang, Y. Zhang, F. Li, G. Shao and Y. Song, *Nano Energy*, 2018, **46**, 203–211.
- 22 Y. Y. Kim, T. Y. Yang, R. Suhonen, M. Valimaki, T. Maaninen, A. Kemppainen, N. J. Jeon and J. Seo, *Adv. Sci.*, 2019, **6**, 1802094.
- 23 D.-K. Lee, D.-N. Jeong, T. K. Ahn and N.-G. Park, *ACS Energy Lett.*, 2019, **4**, 2393-2401.
- 24 Y. Deng, C. H. Van Brackle, X. Dai, J. Zhao, B. Chen and J. Huang, *Sci. Adv.*, 2019, **5**, eaax7537.
- 25 Q. Liu, Y. Zhao, Y. Ma, X. Sun, W. Ge, Z. Fang, H. Bai, Q. Tian, B. Fan and T. Zhang, *J. Mater. Chem. A*, 2019, **7**, 18275–18284.
- 26 A. S. Subbiah, F. H. Isikgor, C. T. Howells, M. De Bastiani, J. Liu, E. Aydin, F. Furlan, T. G. Allen, F. Xu, S. Zhumagali, S. Hoogland, E. H. Sargent, I. McCulloch and S. De Wolf, *ACS Energy Lett.*, 2020, **5**, 3034–3040.
